# Supplementary material for: Zinc hydroxystannate: a promising solid acid–base bifunctional catalyst
Source: Royal Society of Chemistry journal article supplement (doi:10.1039/c3ra44370a), 2013-11-15
Supplement: c3ra44370a.pdf [file c3ra44370a.pdf]

## Supporting information

# Zinc hydroxystannate: A promising solid acid–base bifunctional catalyst

Swetha Sandesh, Ganapati V. Shanbhag\* and A.B. Halgeri

*Materials science division, Poornaprajna Institute of Scientific Research*

*(PPISR), Bidalur Post, Devanahalli, Bangalore-562110, India.*

*Fax: +91 2361 1836; Tel: +91 2740 8552;*

*\*E-mail: shanbhag@poornaprajna.org.*

## 1. Carbonylation of glycerol with urea

Table S1. Basicity measurement of all the catalysts by Hammett indicator method.

Fig. S1. FT-IR spectrum of ZHS catalyst.

Fig. S2. XRD pattern of recycled catalyst.

## 2. Transesterification of glycerol with dimethyl carbonate

2.1. Experimental Procedure

2.2. Table S2

### 3. Carbonylation of glycerol with urea

Table S1. Basicity measurement of all catalyst by Hammett indicator method

| Catalyst                                   | Colour change                            |                                              | Total (mmol/g) |                 |
|--------------------------------------------|------------------------------------------|----------------------------------------------|----------------|-----------------|
|                                            | Nile Blue<br>( $pK_{BH^+} = 10.1-11.1$ ) | Phenolphthalein<br>( $pK_{BH^+} = 8.0-9.6$ ) | Nile Blue      | Phenolphthalein |
| ZnSn(OH) <sub>6</sub>                      | Blue - Pink                              | No colour change                             | 0.3            | -               |
| ZnSn(OH) <sub>6</sub><br>calcined @ 600 °C | Blue-Pink                                | Colourless – Pink                            | 0.2            | 0.03            |
| CaSn(OH) <sub>6</sub>                      | Blue-Pink                                | Colourless – Pink                            | 0.07           | 0.2             |
| MgSn(OH) <sub>6</sub>                      | Blue-Pink                                | Colourless – Pink                            | 0.2            | 0.1             |
| ZnO                                        | No colour change                         | Colourless – Pink                            | -              | 0.10            |
| SnO <sub>2</sub>                           | No colour change                         |                                              |                |                 |
| Sn(OH) <sub>4</sub>                        | No colour change                         | Colourless – Pink                            | -              | 0.03            |
| MgO                                        | No colour change                         | Colourless – Pink                            | -              | 0.13            |
| CaO                                        | No colour change                         | Colourless – Pink                            | -              | 0.18            |
| HTc (Mg/Al)                                | No colour change                         | Colourless – Pink                            | -              | 0.26            |
| HTc (Zn/Al)                                | No colour change                         | Colourless – Pink                            | -              | 0.18            |

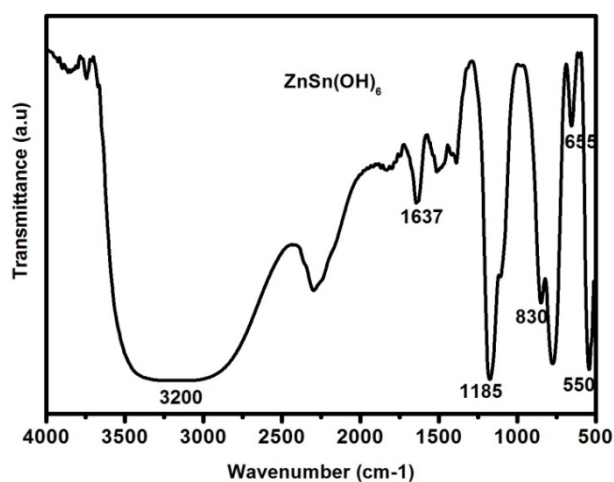

Fig.S1. FT-IR spectrum of ZHS catalyst

FTIR spectrum was recorded from 500-4000  $\text{cm}^{-1}$  for ZHS catalyst. IR bands of Zn–O, Sn–O, Zn–OH, Sn–OH and OH were identified. The peaks at 550 and 655  $\text{cm}^{-1}$  correspond to Sn–O and O–Sn–O stretching vibrations. The IR peak around 1637  $\text{cm}^{-1}$  indicates the formation of the metal

oxide (M-O) whereas 830 and 1185  $\text{cm}^{-1}$ , and 3200  $\text{cm}^{-1}$  correspond to O-H bending and stretching vibrations respectively.

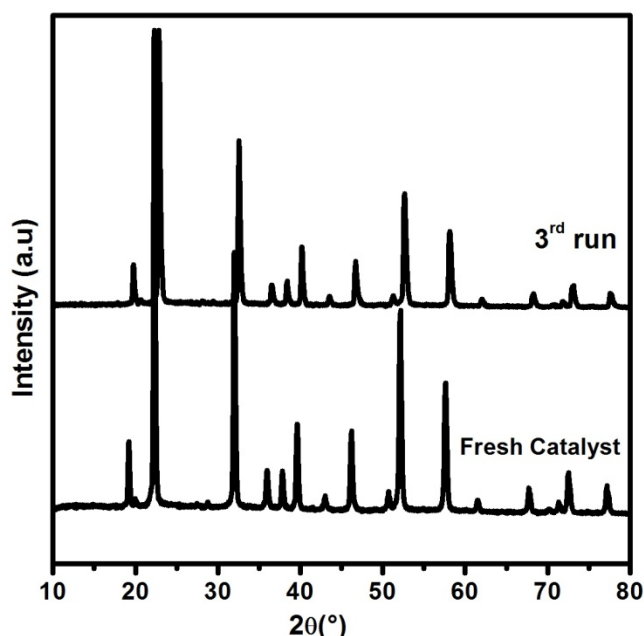

Fig S2. XRD pattern of recycled catalyst.

#### 4. Transesterification of glycerol with dimethyl carbonate

Reaction procedure:

Transesterification reaction of glycerol with dimethyl carbonate (DMC) was carried out in a glass reactor equipped with a magnetic stirring bar, a Liebig condenser, and a thermometer. The required amounts of glycerol and DMC were taken in the reactor and 5 wt% of preactivated catalyst was added into it along with the diluent DMF. The reaction was performed under stirring at 75 °C. After the reaction, the mixture was taken out and centrifuged for 10 min to separate the catalyst from the liquid phase. The thus obtained product was analyzed in gas chromatography (Shimadzu, GC-2014) with flame ionization detector (FID) equipped with a capillary column (0.25 mm I.D and 30 m length, Stabilwax, Restek). All the products were confirmed by gas chromatography with mass spectroscopy (Shimadzu, GCMS QP 2010).

**Table S2** Catalytic activity of different solid base catalysts for transesterification of glycerol with dimethyl carbonate

| Catalyst                           | Calcination temperature (°C) | Conversion of glycerol (mol %) | Yield of glycerol carbonate (mol %) |
|------------------------------------|------------------------------|--------------------------------|-------------------------------------|
| CaSn(OH) <sub>6</sub>              | 150                          | 92.6                           | 90.7                                |
| MgSn(OH) <sub>6</sub>              | 150                          | 88.2                           | 88.0                                |
| ZnSn(OH) <sub>6</sub>              | 150                          | 52.8                           | 52.6                                |
| KF/ Al <sub>2</sub> O <sub>3</sub> | 600                          | 96.0                           | 94.8                                |
| CaO                                | 850                          | 70.8                           | 70.5                                |
| MgO                                | 850                          | 68.4                           | 68.0                                |
| HTc (Mg/Al)                        | 120                          | 94.2                           | 94.0                                |

Reaction conditions: Glycerol: DMC: DMF mole ratio = 1: 2: 0.5, catalyst weight= 5 wt% of total reactant weight, temp = 75 °C, time = 2 h.
